# Supplementary material for: Yolk shell nanocomposite particles as bioactive bone fillers and growth factor carriers
Source: Royal Society of Chemistry journal article supplement (doi:10.1039/c7nr03093b), 2017-01-01
Supplement: c7nr03093b1.pdf [file c7nr03093b1.pdf]

## Yolk Shell Nanocomposite Particles as Bioactive Bone Fillers and Growth Factor

### Carriers

*Dr. Pujiang Shi, Dr. Sunny A. Abbah, Dr. Chuah Yon Jin, Prof. Jun Li, Prof. Yong Zhang,  
Dr. Pengfei He, Prof. Hee-Kit Wong and Prof. James C H Goh\**

| Gene               | Primer sequence                                                                        | Primer source     |
|--------------------|----------------------------------------------------------------------------------------|-------------------|
| <b>RUNX2</b>       | F: 5' CCT TCC ACT CTC AGT AAG AAG A<br>3'<br>R: 5' TAA GTA AAG GTG GCT GGA TAG T<br>3' | P.Shi et al. [16] |
| <b>Osteocalcin</b> | F: 5' GACACCATGAGGACCCTCTC 3'<br>R: 5' GGCTCCAGGGGATCTGGG 3'                           | P.Shi et al. [16] |
| <b>GAPDH</b>       | F: 5' ATGGGGAAGGTGAAGGTCG 3'<br>R: 5' TAAAAGCAGCCCTGGTGACC 3'                          | P.Shi et al. [16] |

**Table S1.** Primer sequences designed for real-time reverse transcriptase–polymerase chain reaction.

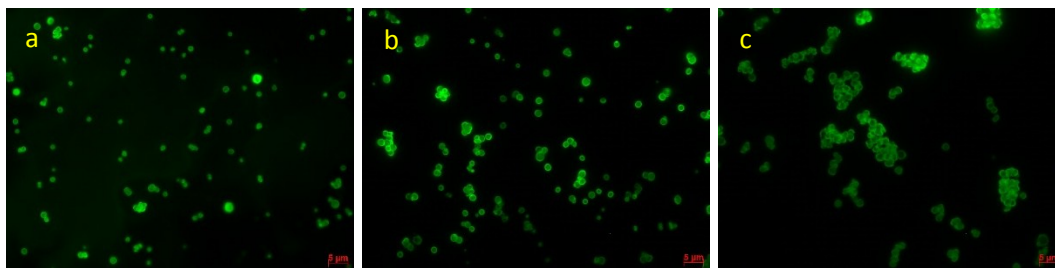

**Figure S1.** Fluorescent images of hollow calcium carbonate particles prepared at several calcium concentrations: 25mM (a), 50mM (b) and 100mM (c).
